# Supplementary material for: Microwave-Assisted Synthesis of Modified Glycidyl Methacrylate–Ethyl Methacrylate Oligomers, Their Physico-Chemical and Biological Characteristics
Source: MDPI journal article supplement (doi:10.3390/molecules27020337), 2022-01-06
Supplement: s1 [file s1]

# Supplementary Materials

## Microwave-Assisted Synthesis of Modified Glycidyl Methacrylate-Ethyl Methacrylate Oligomers, Their Physico- Chemical and Biological Characteristics

*Adam Chyzy*<sup>1</sup>, *Damian Pawelski*<sup>1</sup>, *Vladyslav Vivcharenko*<sup>2</sup>, *Agata Przekora*<sup>2</sup>, *Michael Bratychak*<sup>3</sup>, *Olena Astakhova*<sup>3</sup>, *Joanna Breczko*<sup>4</sup>, *Pawel Drozdal*<sup>5</sup> and *Marta E. Plonska-Brzezinska*<sup>1,\*</sup>

<sup>1</sup> Department of Organic Chemistry, Faculty of Pharmacy with the Division of Laboratory Medicine, Medical University of Białystok, Mickiewicza 2A, 15-222 Białystok, Poland; adam.chyzy@umb.edu.pl (A.Ch.); damian.pawelski@umb.edu.pl (D.P.); marta.plonska-brzezinska@umb.edu.pl (M.E.P.-B.)

<sup>2</sup> Chair and Department of Biochemistry and Biotechnology, Medical University of Lublin, Chodzki 1, 20-093 Lublin, Poland; vlad.vivcharenko@gmail.com (V.V.); agata.przekora@umlub.pl (A.P.)

<sup>3</sup> Lviv Polytechnic National University, 12, St. Bandera str., 79013 Lviv, Ukraine; mbratychak@gmail.com (M.B.); olena.brat@gmail.com (O.A.)

<sup>4</sup> Faculty of Chemistry, University of Białystok, Ciołkowskiego 1k, 15-245 Białystok, Poland; j.luszczyn@uwb.edu.pl (J.B.)

<sup>5</sup> Department of Structural Biology of Prokaryotic Organisms, Institute of Bioorganic Chemistry, Polish Academy of Sciences, Z. Noskowskiego St. 12/14, 61-704 Poznań, Poland; pdrozdal@ibch.poznan.pl (P.D.)

\* Correspondence: marta.plonska-brzezinska@umb.edu.pl (M.E.P.-B.); Tel.: +4885-748-5687

**Figure S1.**  $^{13}\text{C}$  NMR spectrum of [P(EMA)-*co*-(GMA)].  $^{13}\text{C}$  NMR ( 176 MHz, DMSO- $\text{d}_6$ ),  $\delta$  [ppm] : 176.9 and 175.8 ( $>\text{C}=\text{O}$ ), 79.2 and 65.7 ( $>\text{C}-\text{OR}$ ), 60.5, 53.5, 48.6, 48.5, 18.4, 16.5, 13.5.

**Figure S2.**  $^1\text{H}$  NMR spectrum of [P(EMA)-*co*-(GMA)]-ETA(1).  $^1\text{H}$  NMR (400 MHz, DMSO- $\text{d}_6$ ),  $\delta$  [ppm] : 0.76 and 0.92 (br, backbone  $\text{CH}_3$ ), 1.17 (br, ethyl ester  $\text{CH}_3$ ), 1.77-1.89 (m, backbone  $\text{CH}_2$ ), 2.59 (br,  $-\text{CH}_2-\text{NH}-\text{CH}_2-$ ), 3.34-3.37 (m,  $\text{O}-\text{CH}_2-\text{CH}<$ ), 3.76 (br,  $\text{CH}_2-\text{OH}$ ), 3.96 (br,  $\text{CH}_2$  in Et).

**Figure S3.**  $^1\text{H}$  NMR spectrum of [P(EMA)-*co*-(GMA)]-ETA(2).  $^1\text{H}$  NMR (400 MHz, DMSO- $\text{d}_6$ ),  $\delta$  [ppm] : 0.76 and 0.92 (br, backbone  $\text{CH}_3$ ), 1.12-1.17 (m, ethyl ester  $\text{CH}_3$ ), 1.77-1.89 (m, backbone  $\text{CH}_2$ ), 2.59 (br,  $-\text{CH}_2-\text{NH}-\text{CH}_2-$ ), 3.34-3.37 (m,  $\text{O}-\text{CH}_2-\text{CH}<$ ), 3.75 (br,  $\text{CH}_2-\text{OH}$ ), 3.97 (br,  $\text{CH}_2$  in Et).

**Figure S4.**  $^1\text{H}$  NMR spectrum of [P(EMA)-*co*-(GMA)]-Orn(2).

**Figure S5.**  $^1\text{H}$  NMR spectrum of [P(EMA)-*co*-(GMA)]-Xyl.

**Table S1.** Molecular mass distribution for [P(EMA)-*co*-(GMA)].

**Table S2.** Molecular mass distribution for [P(EMA)-*co*-(GMA)]-Xyl.

**Table S3.** Molecular mass distribution for [P(EMA)-*co*-(GMA)]-ETA(2).

**Table S4.** Molecular mass distribution for [P(EMA)-*co*-(GMA)]-Orn(2).

**Table S5.** Determination of epoxy groups for [P(EMA)-*co*-(GMA)].

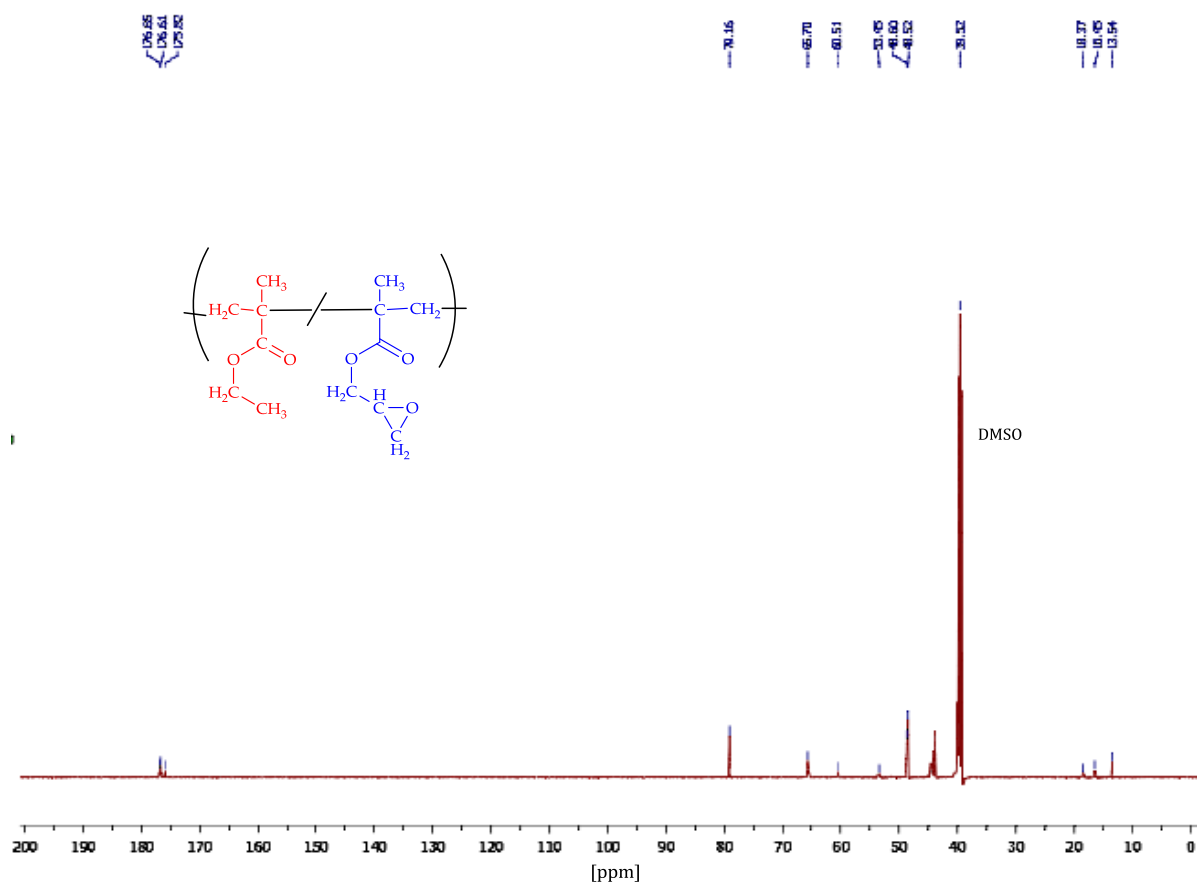

**Figure S1.**  $^{13}\text{C}$  NMR spectrum of [P(EMA)-*co*-(GMA)].  $^{13}\text{C}$  NMR (176 MHz,  $\text{DMSO-d}_6$ ),  $\delta$  (ppm): 176.9 and 175.8 ( $>\text{C}=\text{O}$ ), 79.2 and 65.7 ( $>\text{C}-\text{OR}$ ), 60.5, 53.5, 48.6, 48.5, 18.4, 16.5, 13.5.

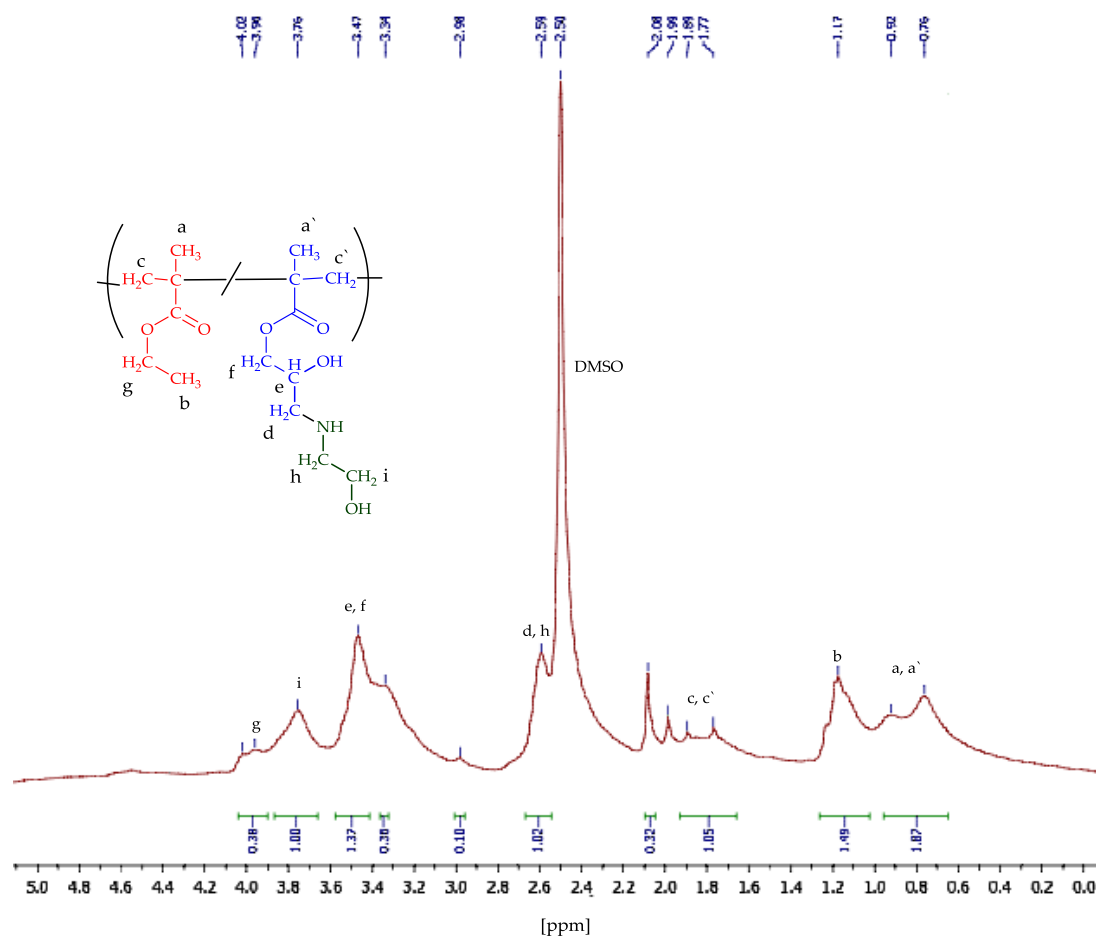

**Figure S2.**  $^1\text{H}$  NMR spectrum of [P(EMA)-co-(GMA)]-ETA(1).  $^1\text{H}$  NMR (400 MHz,  $\text{DMSO-d}_6$ ),  $\delta$  (ppm): 0.76 and 0.92 (br, backbone  $\text{CH}_3$ ), 1.17 (br, ethyl ester  $\text{CH}_3$ ), 1.77-1.89 (m, backbone  $\text{CH}_2$ ), 2.59 (br,  $-\text{CH}_2-\text{NH}-\text{CH}_2-$ ), 3.34-3.37 (m,  $\text{O}-\text{CH}_2-\text{CH}<$ ), 3.76 (br,  $\text{CH}_2-\text{OH}$ ), 3.96 (br,  $\text{CH}_2$  in Et).

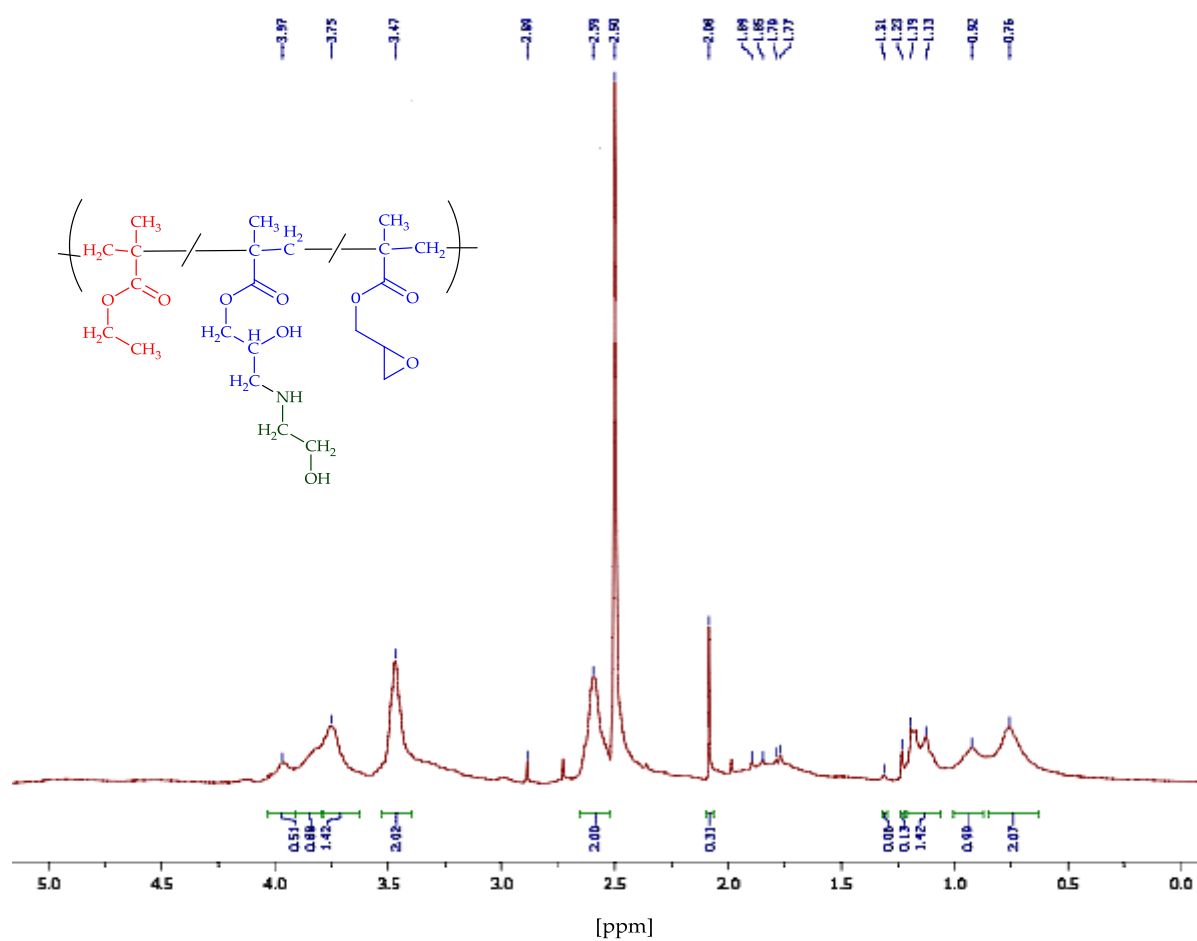

**Figure S3.**  $^1\text{H}$  NMR spectrum of [P(EMA)-*co*-(GMA)]-ETA(2).  $^1\text{H}$  NMR (400 MHz,  $\text{DMSO-d}_6$ ),  $\delta$  (ppm): 0.76 and 0.92 (br, backbone  $\text{CH}_3$ ), 1.12-1.17 (m, ethyl ester  $\text{CH}_3$ ), 1.77-1.89 (m, backbone  $\text{CH}_2$ ), 2.59 (br,  $-\text{CH}_2\text{-NH-CH}_2-$ ), 3.34-3.37 (m,  $\text{O-CH}_2\text{-CH}<$ ), 3.75 (br,  $\text{CH}_2\text{-OH}$ ), 3.97 (br,  $\text{CH}_2$  in Et).

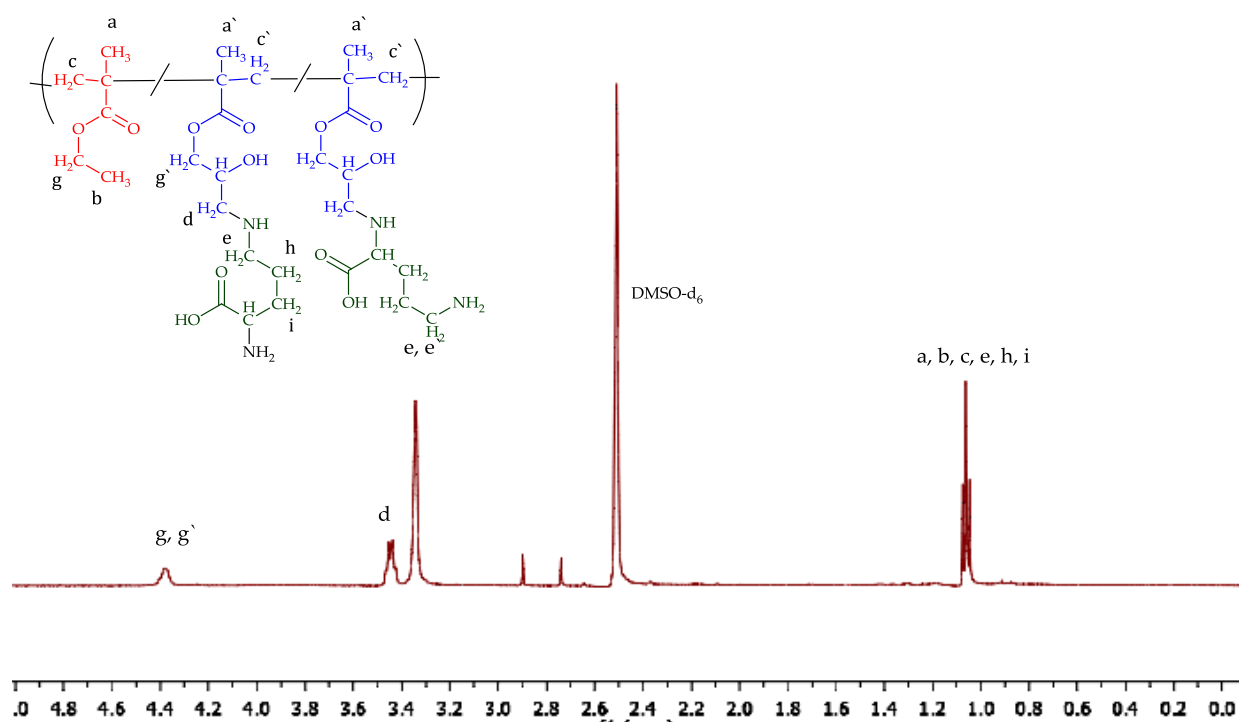

**Figure S4.**  $^1\text{H}$  NMR spectrum of  $[\text{P}(\text{EMA})\text{-co-}(\text{GMA})]\text{-Orn}(2)$ .

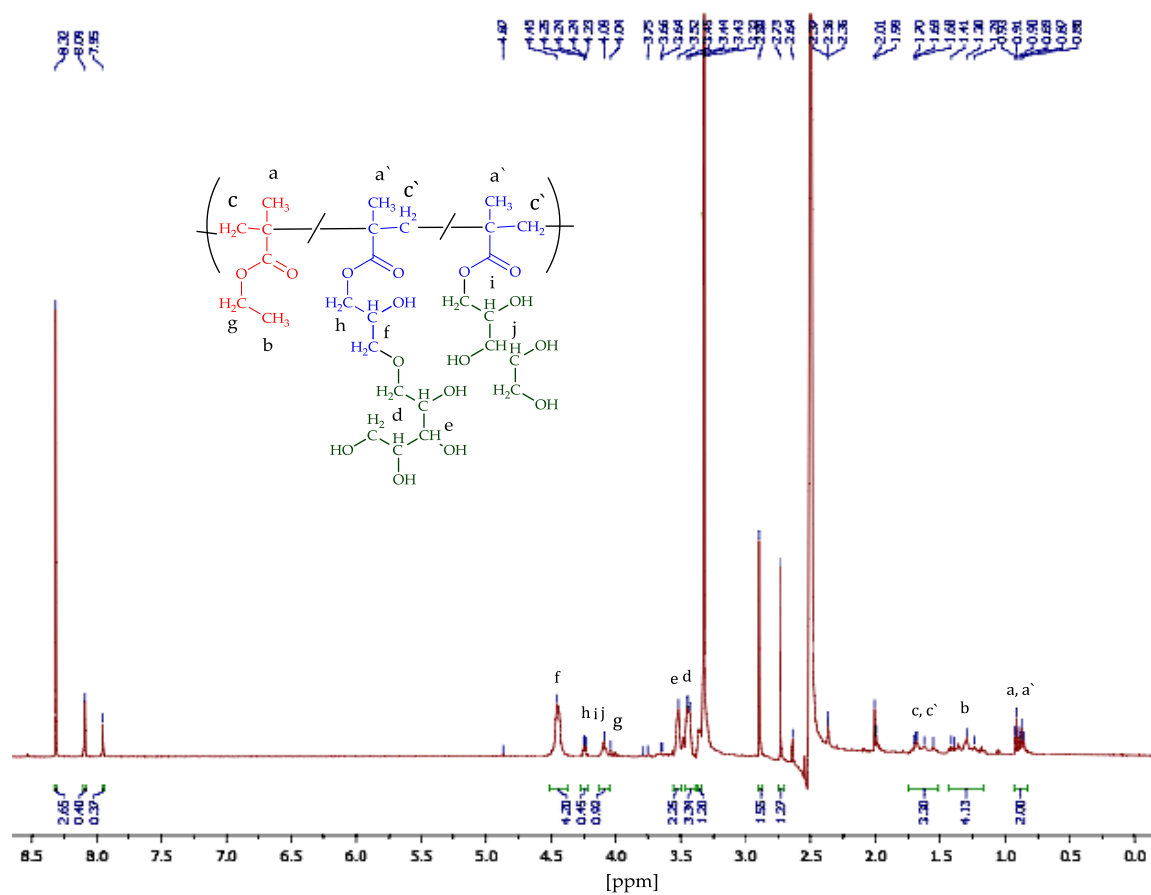

**Figure S5.**  $^1\text{H}$  NMR spectrum of [P(EMA)-co-(GMA)]-Xyl.

**Table S1.** Molecular mass distribution for [P(EMA)-*co*-(GMA)].

| Mass range (Da) | [P(EMA)- <i>co</i> -(GMA)] |
|-----------------|----------------------------|
|                 | Percentage (%)             |
| 1482.8-1202.2   | 0.50                       |
| 1202.2-1004.3   | 0.77                       |
| 1004.3-601.2    | 4.18                       |
| 601.2-300.8     | 86.84                      |
| 300.8-234.4     | 7.71                       |

**Table S2.** Molecular mass distribution for [P(EMA)-*co*-(GMA)]-Xyl.

| Mass range (Da) | [P(EMA)- <i>co</i> -(GMA)]-Xyl |
|-----------------|--------------------------------|
|                 | Percentage (%)                 |
| 2754.7-2007.2   | 0.38                           |
| 2007.2-1004.1   | 5.61                           |
| 1004.1-601.3    | 28.34                          |
| 601.3-270.5     | 65.67                          |

**Table S3.** Molecular mass distribution for [P(EMA)-*co*-(GMA)]-ETA(2).

| Mass range (Da) | [P(EMA)- <i>co</i> -(GMA)]-ETA |
|-----------------|--------------------------------|
|                 | Percentage (%)                 |
| 2664.4-2001.2   | 0.01                           |
| 2001.2-1004.2   | 2.45                           |
| 1004.2-601.3    | 9.91                           |
| 601.3-217.1     | 87.64                          |

**Table S4.** Molecular mass distribution for [P(EMA)-*co*-(GMA)]-Orn(2).

| Mass range (Da) | [P(EMA)- <i>co</i> -(GMA)]-Orn |
|-----------------|--------------------------------|
|                 | Percentage (%)                 |
| 2560.1-2007.4   | 0.50                           |
| 2007.4-1004.2   | 5.72                           |
| 1004.2-601.3    | 57.75                          |
| 601.3-217.1     | 36.03                          |



**Table S5.** Determination of epoxy groups for [P(EMA)-*co*-(GMA)] using hydrochloric acid-acetone-standing method.

| <b>Sample</b> | <b>Mass of oligomer<br/>(g)</b> | <b>Volume of titrant<br/>(mL)</b> | <b><math>L_{ep}</math><br/>(%)</b> |
|---------------|---------------------------------|-----------------------------------|------------------------------------|
| blank         | 0                               | 30.55                             | -                                  |
| 1             | 0.1999                          | 18.40                             | 26.25                              |
| 2             | 0.2003                          | 18.70                             | 25.44                              |
| 3             | 0.2003                          | 18.30                             | 26.30                              |
